# Supplementary material for: Immunomagnetic nanoparticles based on a hydrophilic polymer coating for sensitive detection of Salmonella in raw milk by polymerase chain reaction
Source: Royal Society of Chemistry journal article supplement (doi:10.1039/c4ra09799h), 2014-12-10
Supplement: c4ra09799h1.pdf [file c4ra09799h1.pdf]

(A) The synthesis of Dextran IONP by coprecipitation method

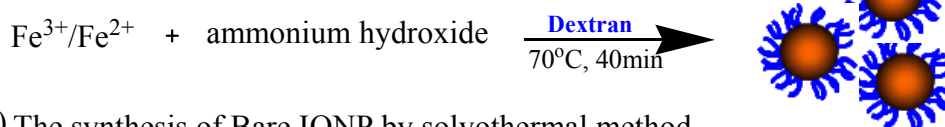

(B) The synthesis of Bare IONP by solvothermal method

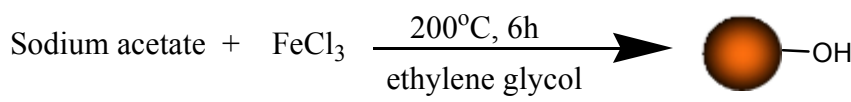

(C) The synthesis of PHEMA/PMPC IONP by graft from method

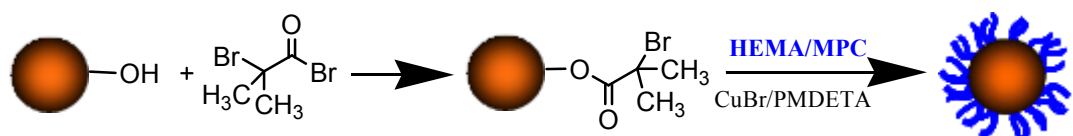

**Fig S1.** Synthetic routes of the Dextran IONP, Bare IONP and PHEMA/MPMC IONP.

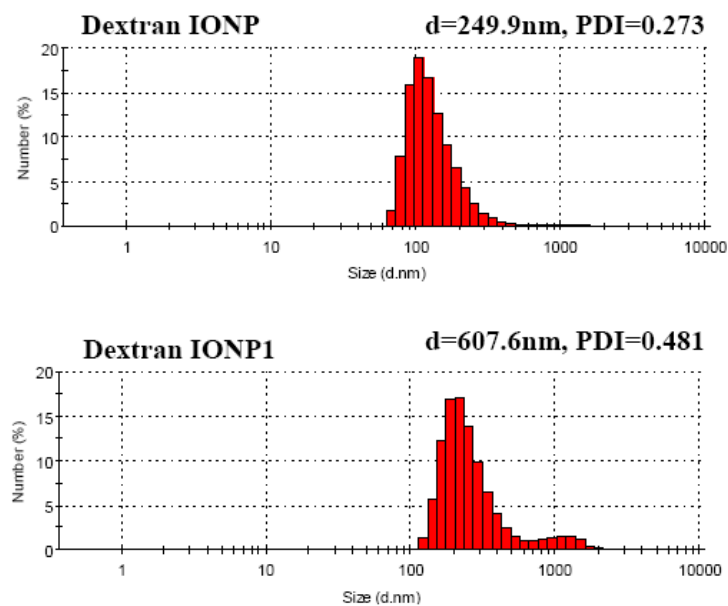

**Fig. S2.** The DLS measurement of Dextran IONP

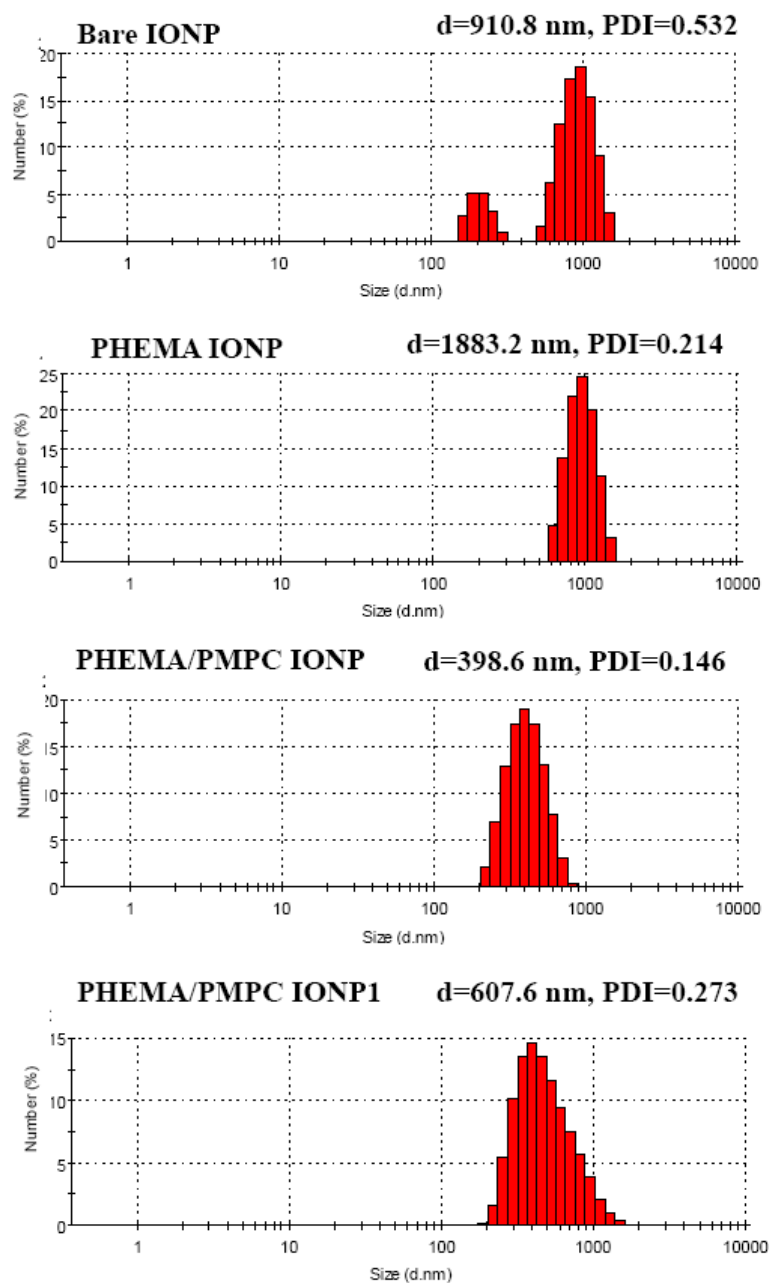

**Fig. S3.** The DLS measurement of Bare IONP and PHEMA/PMPC IONP

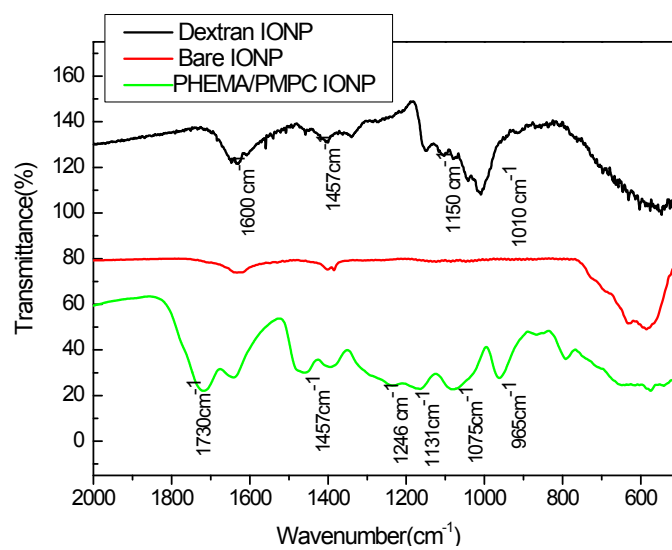

Fig.S4 FTIR spectra of iron oxide samples.

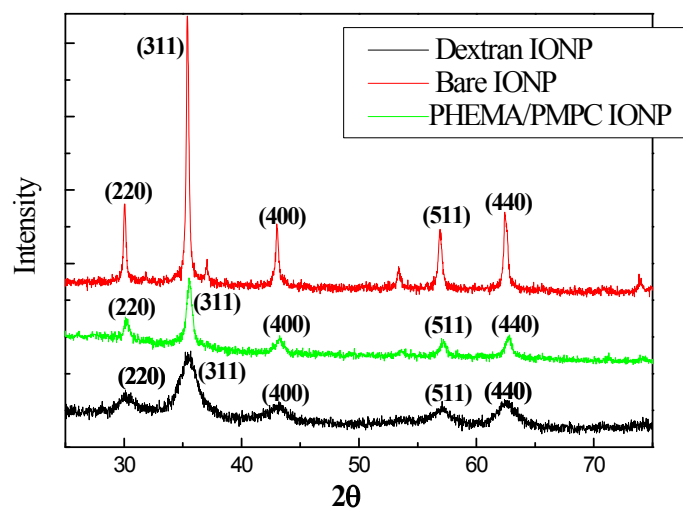

Fig. S5 Overlay of X-ray power diffraction patterns of the iron oxide nanoparticles.

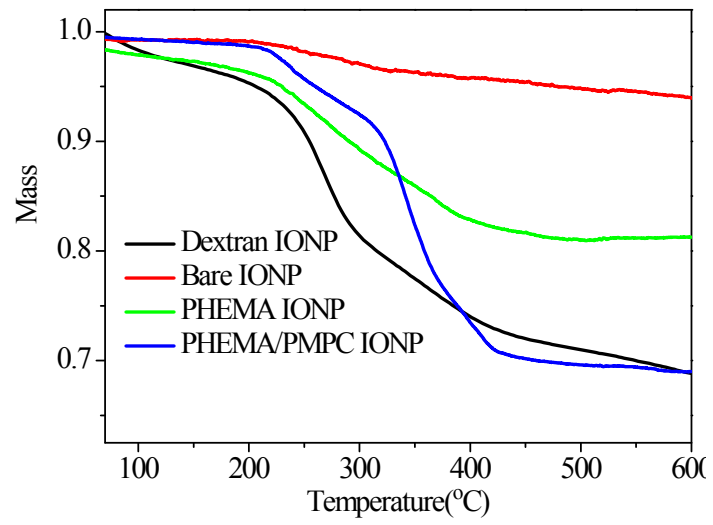

**Fig.S6** The thermogravimetric analysis of iron oxide nanoparticle

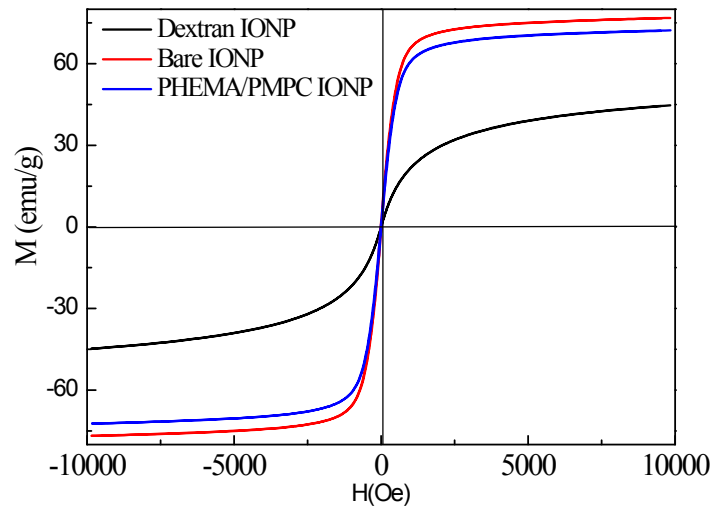

**Fig.S7** The magnetic hysteresis loops of of iron oxide nanoparticle
